# Supplementary material for: Squaramide-based lab-on-a-molecule for the detection of silver ion and nitroaromatic explosives
Source: Royal Society of Chemistry journal article supplement (doi:10.1039/c5ra18754k), 2015-01-01
Supplement: c5ra18754k1.pdf [file c5ra18754k1.pdf]

## Supporting Information

### Squaramide-based lab-on-a-molecule for the detection of silver ion and nitroaromatic explosives

Bo Shan<sup>a</sup>, Rui Shi<sup>a</sup>, Shaohua Jin<sup>a</sup>, Shusen Chen<sup>a</sup>, Yunfei Liu<sup>a</sup>, Qinghai Shu<sup>a\*</sup>

<sup>a</sup> School of Material Science and Engineering, Beijing Institute of Technology, 100081 Beijing, PR China

#### Contents

|                                                                                  |    |
|----------------------------------------------------------------------------------|----|
| Fig. S1 <sup>1</sup> H NMR Spectrum of probe SA                                  | P2 |
| Fig. S2 The mass spectrum of SA                                                  | P2 |
| Fig. S3 The absorption spectra of SA with different metal ions                   | P3 |
| Fig.S4 Emission and absorption spectra of SA and TNT                             | P3 |
| Fig.S5 Emission spectra of SA with different explosives                          | P4 |
| Fig.S6 Emission spectra of SA upon addition of various equiv. of NT              | P4 |
| Fig.S7 Emission spectra of SA upon addition of various equiv. of DNT             | P5 |
| Fig.S8 Emission spectra of SA upon addition of various equiv. of TNT             | P5 |
| Fig.S9 The UV-vis spectra of SA with different explosives                        | P6 |
| Fig.S10 UV-Vis spectra of SA, TNT, SA and TNT mix solution                       | P6 |
| Fig.S11 UV-vis absorption titration of SA upon addition of various equiv. of TNT | P7 |

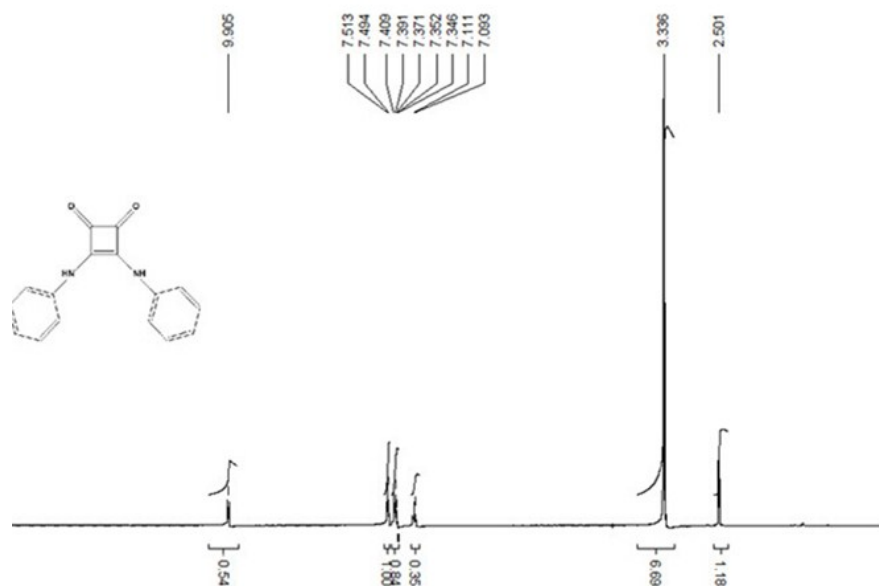

**Fig. S1**  $^1\text{H NMR}$  spectra of probe SA in  $\text{DMSO-d}_6$ .

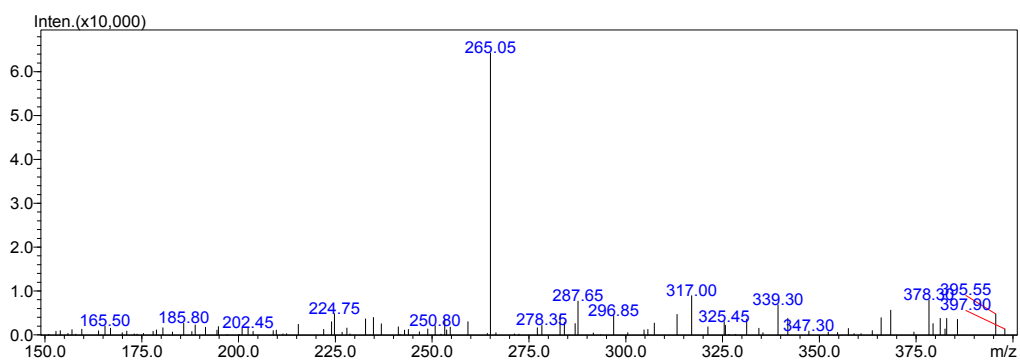

**Fig. S2** The mass spectrum of SA.

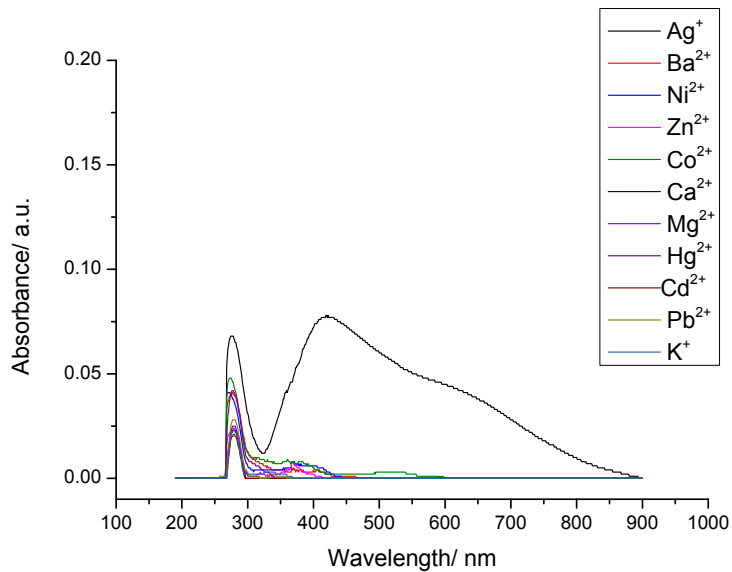

**Fig. S3** The UV-vis absorption of SA (10  $\mu$ M) in the presence of 50 equiv of different metal ions in DMSO buffered solution (pH = 7.24, DMSO: H<sub>2</sub>O = 90:10, v/v).

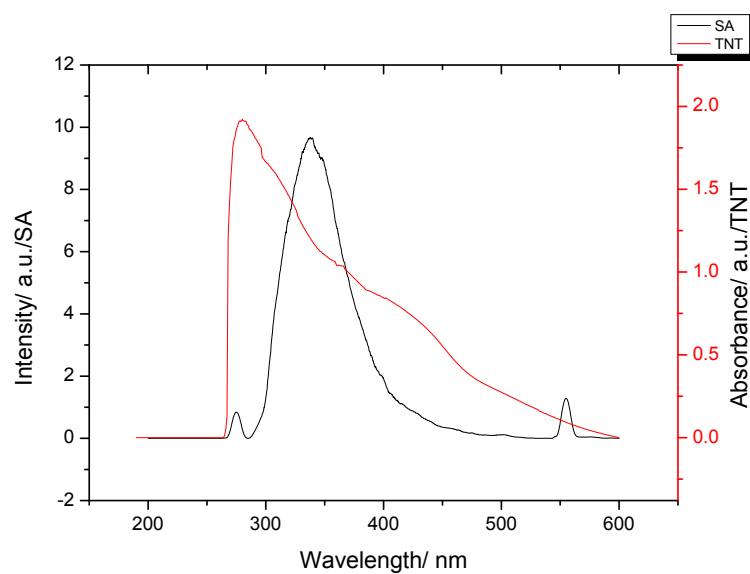

**Fig. S4** Emission of SA and absorption of TNT in DMSO buffered solution (pH = 7.24, DMSO: H<sub>2</sub>O = 90:10, v/v).

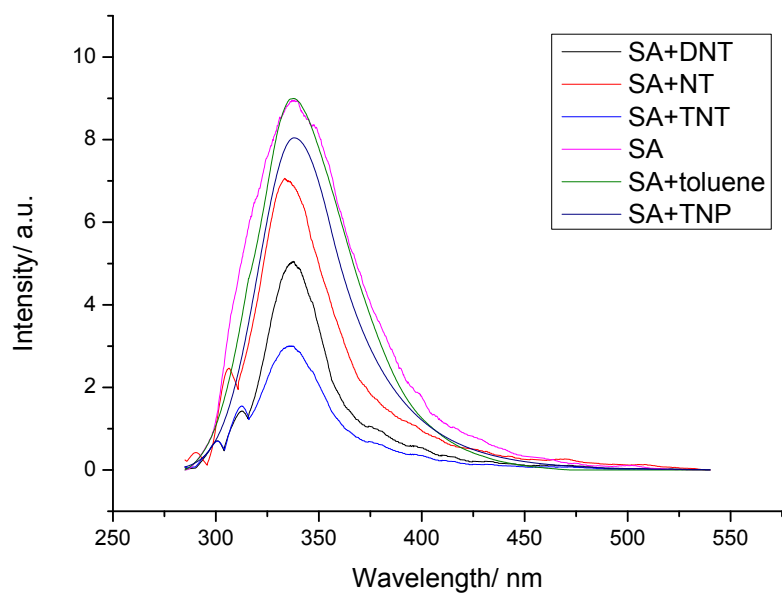

**Fig. S5** Emission spectra of SA in the presence of 1 equiv of different analytes in DMSO buffered solution (pH = 7.24, DMSO: H<sub>2</sub>O = 90:10, v/v).

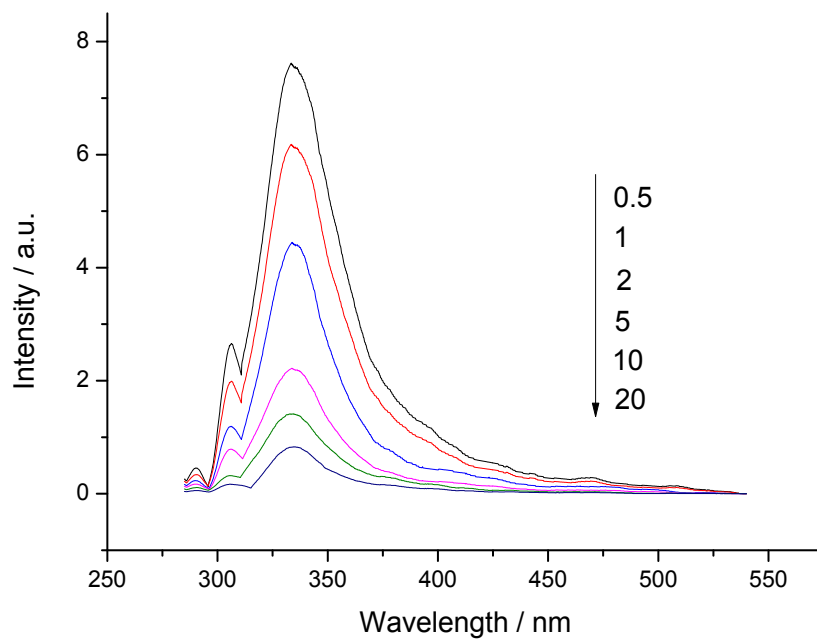

**Fig. S6** Emission spectra of SA upon addition of 0.5, 1, 2, 5, 10, 20 μM of NT in DMSO buffered solution (pH = 7.24, DMSO: H<sub>2</sub>O = 90:10, v/v).

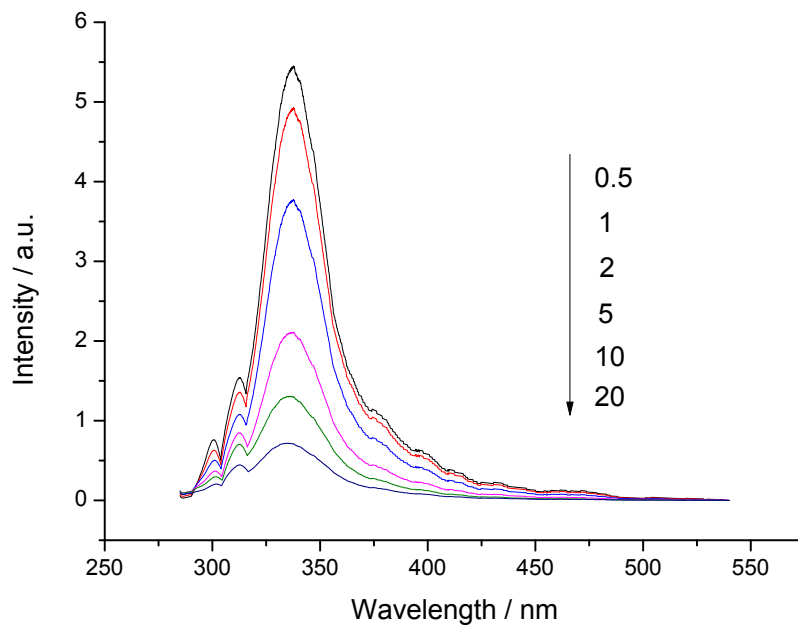

**Fig. S7** Emission spectra of SA upon addition of 0.5, 1, 2, 5, 10, 20 μM of DNT in DMSO buffered solution (pH = 7.24, DMSO: H<sub>2</sub>O = 90:10, v/v).

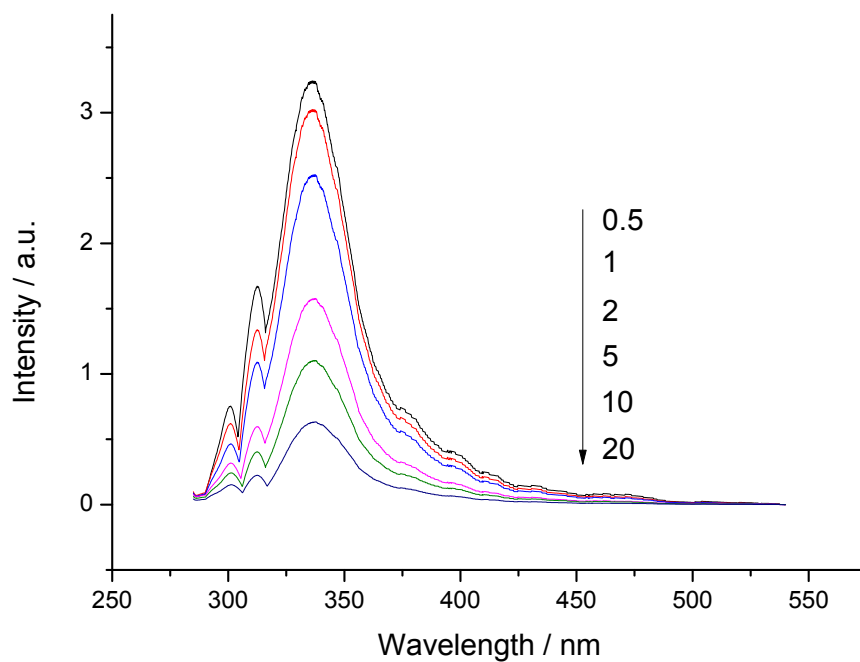

**Fig. S8** Emission spectra of SA upon addition of 0.5, 1, 2, 5, 10, 20 μM of TNP in DMSO buffered solution (pH = 7.24, DMSO: H<sub>2</sub>O = 90:10, v/v).

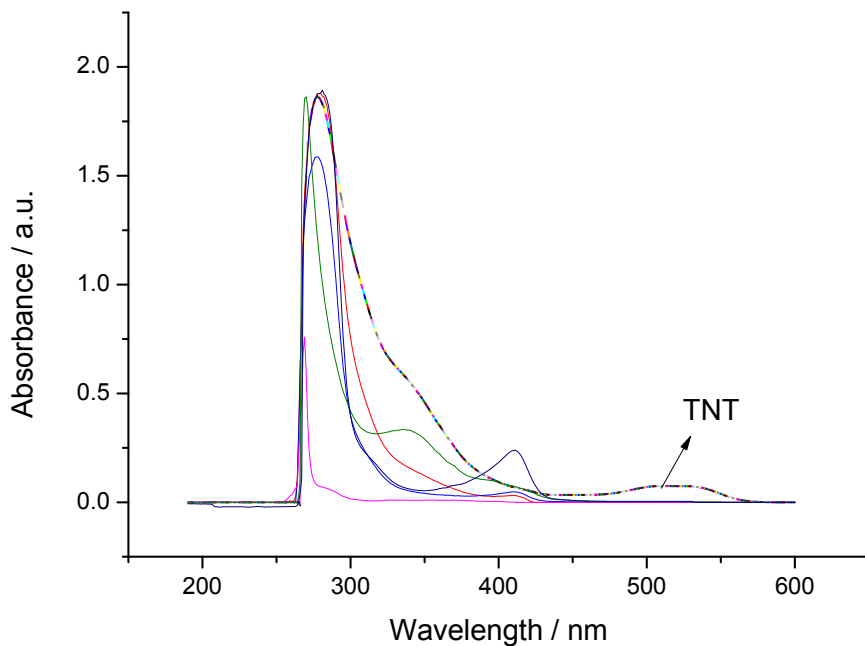

**Fig. S9** The UV-vis absorption of SA in the presence of 50 equiv of different explosives in DMSO buffered solution (pH = 7.24, DMSO: H<sub>2</sub>O = 90:10, v/v).

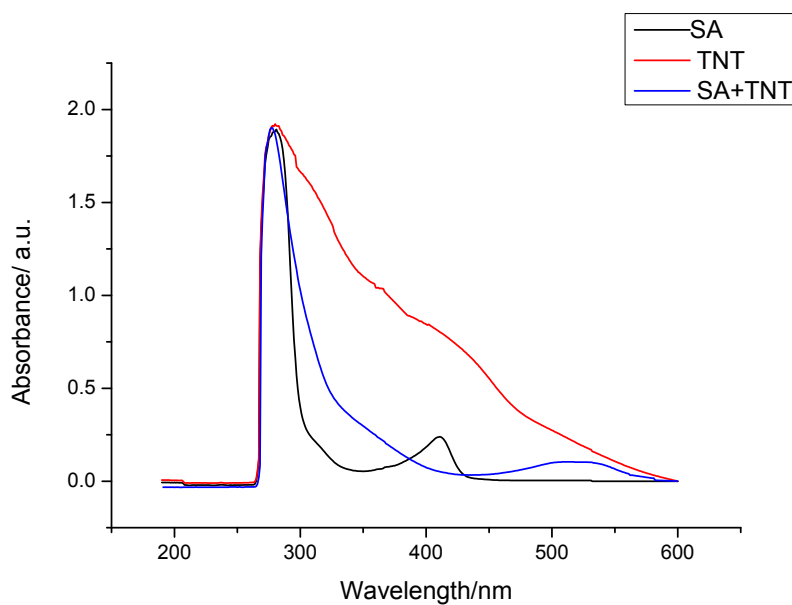

**Fig. S10** UV-Vis absorption of SA (black), TNT (red), SA and TNT mixture solution (blue) in DMSO buffered solution (pH = 7.24, DMSO: H<sub>2</sub>O = 90:10, v/v).

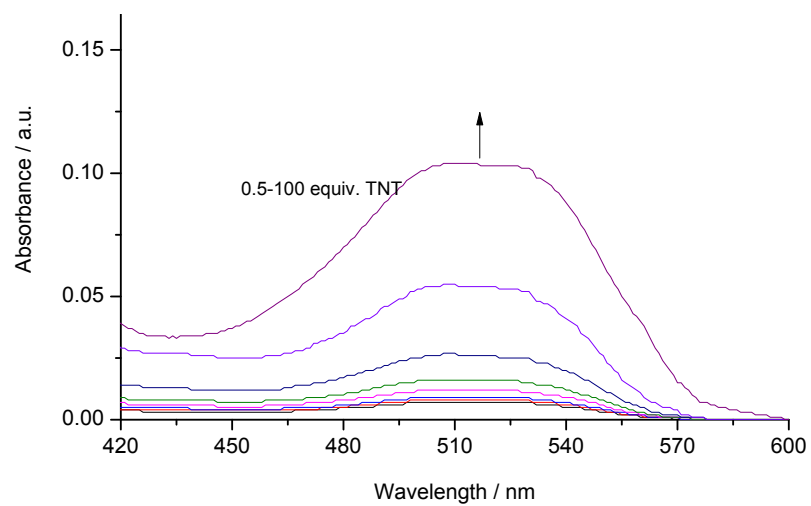

**Fig. S11** UV-vis absorption titration of SA (10 μM) upon addition of 0.5, 1, 2, 5, 10, 20, 50, 100 μM of TNT in DMSO.
